# Supplementary material for: Impact of Levetiracetam Treatment on 5-Aminolevulinic Acid Fluorescence Expression in IDH1 Wild-Type Glioblastoma
Source: MDPI journal article supplement (doi:10.3390/cancers14092134), 2022-04-25
Supplement: s1 [file s1]

# Impact of Levetiracetam Treatment on 5-Aminolevulinic Acid Fluorescence Expression in IDH1 Wild-Type Glioblastoma

Johannes Wach, Ági Güresir, Motaz Hamed, Hartmut Vatter, Ulrich Herrlinger and Erdem Güresir

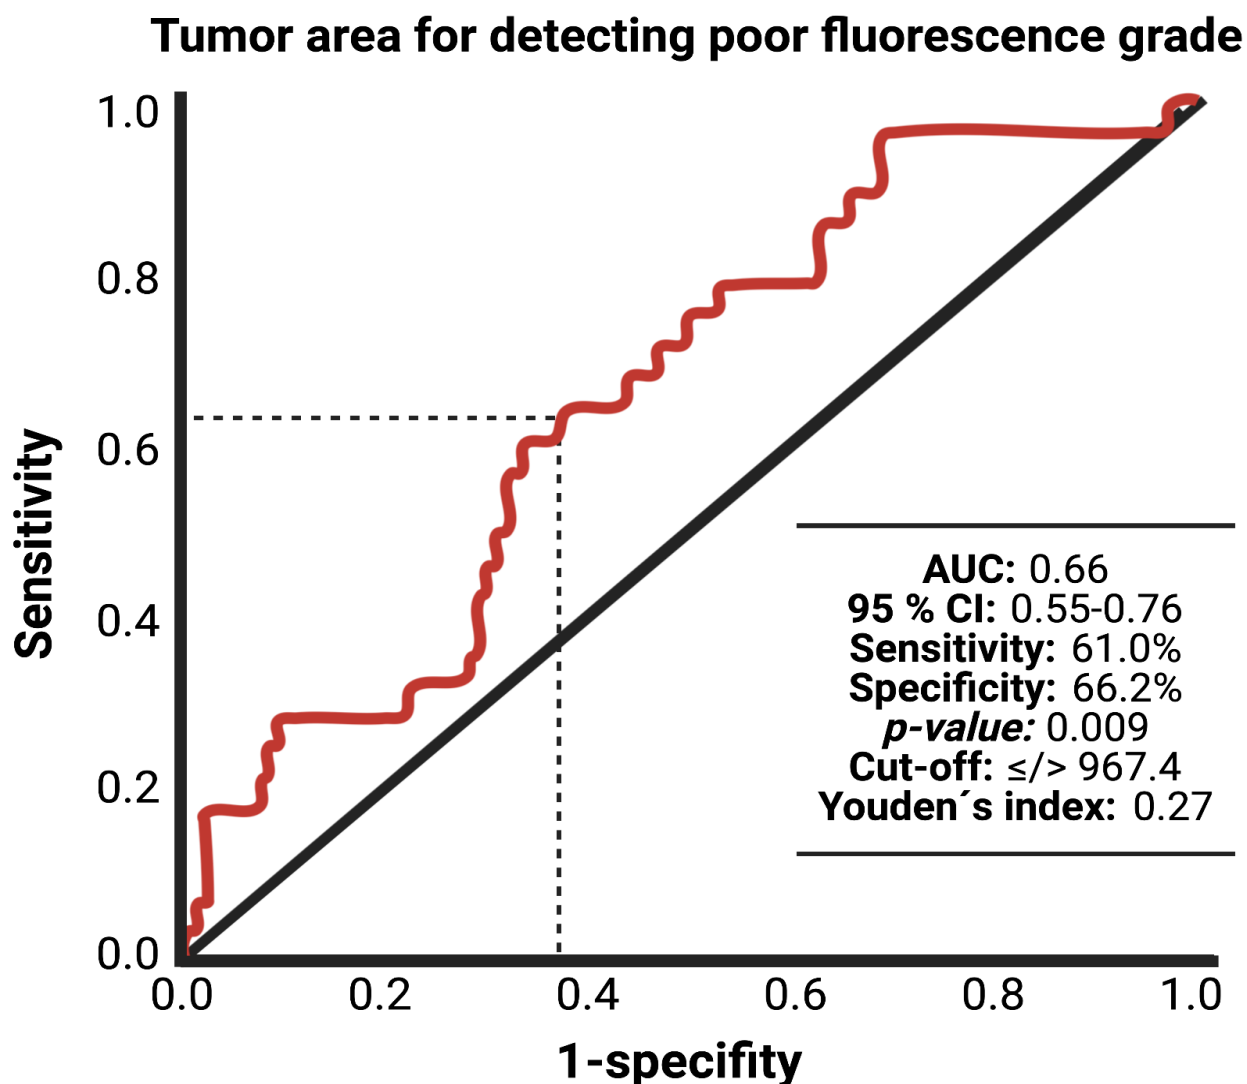

**Figure S1.** Receiver-operating characteristic curve illustrating tumor area in the prediction of poor fluorescence (fluorescence grades 0 + 1).
